# Supplementary material for: Elevated FSP1 protects KRAS-mutated cells from ferroptosis during tumor initiation
Source: Springer Nature journal article supplement (doi:10.1038/s41418-022-01096-8), 2022-11-29
Supplement: 41418_2022_1096_MOESM2_ESM.pdf [file 41418_2022_1096_MOESM2_ESM.pdf]

| 8 <sup>th</sup> author  | First name | Family name | I agree to the proposed new authorship shown in section 4 /and the addition/removal* of my name to the authorship list /and the proposed change in corresponding author | Signature             | Date                |
|-------------------------|------------|-------------|-------------------------------------------------------------------------------------------------------------------------------------------------------------------------|-----------------------|---------------------|
|                         | Julia      | Beck        |                                                                                                                                                                         |                       |                     |
| 9 <sup>th</sup> author  |            |             | I agree to the proposed new authorship shown in section 4 /and the addition/removal* of my name to the authorship list /and the proposed change in corresponding author |                       |                     |
| 10 <sup>th</sup> author | Keiko      | Nakayama    | I agree to the proposed new authorship shown in section 4 /and the addition/removal* of my name to the authorship list /and the proposed change in corresponding author | <i>Keiko Nakayama</i> | <i>Oct. 7, 2022</i> |

Please use an additional sheet if there are more than 10 authors.

### In case of author collaborations with formal agreement:

| Representative/legal guarantor | Name of consortium/consortia | First name | Family name | I agree to the proposed new authorship shown in section 4 /and the addition/removal* of my name to the authorship list /and the proposed change in corresponding author | Signature | Date |
|--------------------------------|------------------------------|------------|-------------|-------------------------------------------------------------------------------------------------------------------------------------------------------------------------|-----------|------|
|                                |                              |            |             |                                                                                                                                                                         |           |      |

Both added /removed authors should complete the information in the first table under Section 6.

----- End of form -----
